# Neuronal Variability Reflects Probabilistic Inference Tuned to Natural Image Statistics

Dylan Festa<sup>1</sup> Amir Aschner<sup>2</sup> Aida Davila<sup>2</sup> Adam Kohn<sup>1,2,3</sup>  
Ruben Coen-Cagli<sup>1\*</sup>

<sup>1</sup>*Department of Systems and Computational Biology*

<sup>2</sup>*Dominick Purpura Department of Neuroscience*

<sup>3</sup>*Department of Ophthalmology and Visual Sciences*

Albert Einstein College of Medicine, Bronx, NY, USA

\* Corresponding author — [ruben.coen-cagli@einsteinmed.org](mailto:ruben.coen-cagli@einsteinmed.org)

## 10 **Abstract**

11 Neuronal activity in sensory cortex fluctuates over time and across repetitions of the same  
12 input. This variability is often considered detrimental to neural coding. The theory of neural  
13 sampling proposes instead that variability encodes the uncertainty of perceptual inferences.  
14 In primary visual cortex (V1), modulation of variability by sensory and non-sensory factors  
15 supports this view. However, it is unknown whether V1 variability reflects the statistical  
16 structure of visual inputs, as would be required for inferences correctly tuned to the statistics  
17 of the natural environment. Here we combine analysis of image statistics and recordings in  
18 macaque V1 to show that probabilistic inference tuned to natural image statistics explains the  
19 widely observed dependence between spike-count variance and mean, and the modulation of  
20 V1 activity and variability by spatial context in images. Our results show that the properties of  
21 a basic aspect of cortical responses — their variability — can be explained by a probabilistic  
22 representation tuned to naturalistic inputs.

## 23 **1 Introduction**

24 In sensory cortex, neuronal activity is typically variable, both in the absence of sensory input  
25 and for repeated presentations of a stimulus (Tolhurst, Movshon, et al. 1983; Tomko and  
26 Crapper 1974). This variability is modulated by several sensory (M. Chen, Yan, et al. 2014;  
27 Churchland, Yu, et al. 2010; Coen-Cagli and Solomon 2019; Goris, Movshon, et al. 2014; Kohn  
28 and Smith 2005; Orbán, Berkes, et al. 2016; Ponce-Alvarez, Thiele, et al. 2013; Rabinowitz,  
29 Goris, et al. 2015; Solomon, S. C. Chen, et al. 2014; Verhoef and Maunsell 2017) and non-  
30 sensory (Cohen and Maunsell 2009; Dadarlat and Stryker 2017; Mitchell, Sundberg, et al. 2009;

31 White, Abbott, et al. 2012) factors, suggesting it may play a functional role rather than simply  
32 reflecting noise. Understanding the functional role of variability is at the core of the inquiry  
33 of neural coding (Beck, Ma, et al. 2012; Dinstein, Heeger, et al. 2015; Fiser, Berkes, et al. 2010;  
34 Pouget, Dayan, et al. 2003; Shadlen and Newsome 1998; Sompolinsky, Yoon, et al. 2001).

35 Parametric descriptive models can capture how stimuli modulate neuronal variability (Charles,  
36 Park, et al. 2018; Coen-Cagli and Solomon 2019; Goris, Movshon, et al. 2014; Stevenson 2016),  
37 but they do not address why modulation of variability occurs and what functional role it  
38 might play. Here we develop and test a normative model, based on efficient coding (Bell and  
39 Sejnowski 1997; Karklin and Lewicki 2009; Olshausen and Field 1996; Schwartz and Simoncelli  
40 2001) and probabilistic inference (Berkes, Orbán, et al. 2011; Coen-Cagli, Kohn, et al. 2015;  
41 Lochmann, Ernst, et al. 2012; Ma, Beck, et al. 2006; Orbán, Berkes, et al. 2016), to explain the  
42 properties of response variability in sensory cortex. In this approach, we hypothesize about  
43 functional and computational principles of cortical processing, to generate predictions about  
44 cortical activity. Specifically, we propose that probabilistic inference tuned to the statistics of  
45 natural images can explain the properties of response variability in visual cortex.

46 Although normative models have typically been used to explain trial-averaged responses, they  
47 can also be used to explain response variability (Boerlin, Machens, et al. 2013; Fiser, Berkes,  
48 et al. 2010; Hoyer and Hyvärinen 2003; Hunsberger, Scott, et al. 2014). In particular, some  
49 aspects of variability in primary visual cortex (V1) can be explained by the theory of neural  
50 sampling. This theory builds on the broader idea that the brain approximates operations of  
51 probabilistic inference (Knill and Pouget 2004; Pouget, Beck, et al. 2013), and hypothesizes  
52 that instantaneous neuronal activity represents samples from a probability distribution (Fiser,  
53 Berkes, et al. 2010; Haefner, Berkes, et al. 2016; Hoyer and Hyvärinen 2003). According to this  
54 view, variability of neuronal activity reflects uncertainty about the visual input (i.e. the width  
55 of the inferred probability distribution). As a result, variability is reduced by stimulus onset  
56 (Churchland, Yu, et al. 2010) and stimulus contrast (Finn, Priebe, et al. 2007; Kohn and Smith  
57 2005), because of a reduction in uncertainty (Orbán, Berkes, et al. 2016).

79 Here we hypothesize that modulation of uncertainty by visual input should reflect inferences  
80 tuned to the statistics of natural images, and thus that the properties of response variability  
81 should reflect the statistical structure of images. To test this prediction, we consider a suc-  
82 cessful modeling framework, the Gaussian Scale Mixture (GSM; Theis, Hosseini, et al. 2012;  
83 Wainwright, Simoncelli, et al. 2000). This model assumes that images are composed by local  
84 features (e.g. oriented edges; Fig. 1A) and global features (e.g. image contrast), and that V1  
85 neurons aim to represent the local features while discarding the global features (Coen-Cagli,  
86 Dayan, et al. 2012; Coen-cagli, Dayan, et al. 2009; Coen-Cagli, Kohn, et al. 2015; Orbán, Berkes,  
87 et al. 2016; Schwartz and Simoncelli 2001). GSMs can explain the modulation of trial-averaged  
88 V1 responses by stimuli in the surround of the receptive field (RF; Angelucci, Levitt, et al.  
89 2002; Cavanaugh, Bair, et al. 2002b; Sceniak, Ringach, et al. 1999; Sillito and Jones 1996;  
90 Walker, Ohzawa, et al. 1999). However, it is unclear whether this framework can also explain  
91 the surround modulation of variability (Haider, Krause, et al. 2010; Snyder, Morais, et al. 2014)

A

$$\text{Image} = \left( g_c \cdot \text{filter}_c + g_{s1} \cdot \text{filter}_{s1} + g_{s2} \cdot \text{filter}_{s2} + \dots \right) \cdot \nu + \text{noise}$$

B

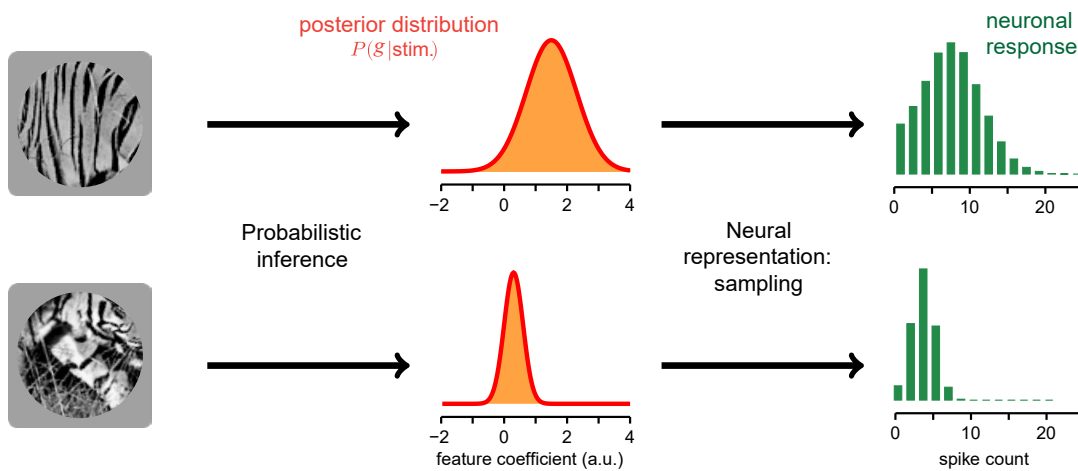

C

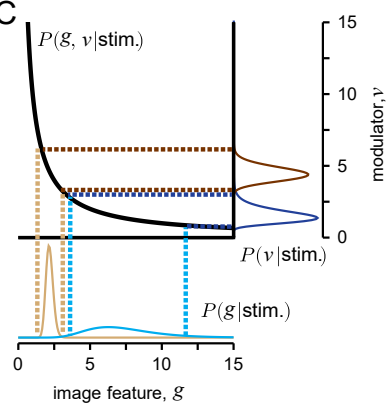

D

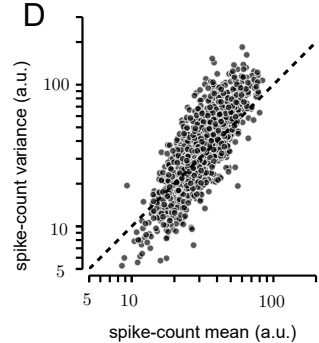

E

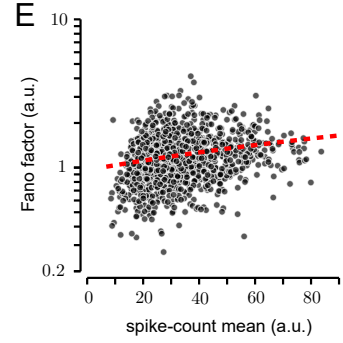

58

69

**Figure 1:** See next page for caption.

61 **Figure 1: Sampling-based inference in the GSM model explains the dependence between spike-**  
62 **count variance and mean.** **A.** Representation of the generative process of the Gaussian scale mixture  
63 (GSM) model, (Methods Eq. 1). The image (left) is described as the combination of local oriented  
64 features weighted by Gaussian coefficients, further multiplied by a global modulator and corrupted by  
65 additive, Gaussian noise. **B.** Encoding of sensory information according to the sampling hypothesis:  
66 the goal of a neuron is to represent the posterior distribution (orange, middle) of the feature it encodes.  
67 The activity of the neuron corresponds to samples from that distribution, therefore the histogram of  
68 spike counts over time or repetitions (green, right) reflects the distribution. **C.** Tuning of mean and  
69 variance in a 1-dimensional version of the GSM with no noise. For fixed input  $x$ , the visual feature  
70  $g$  and the modulator  $\nu$  are bound to lie on the hyperbole  $\nu = x/g$  (black line). Therefore, a larger  
71 estimate of  $\nu$  implies reduced mean and variance of  $g$  (blue versus brown curves). **D.** Mean versus  
72 variance of a GSM model neuron in response to 1,000 patches of natural images. Patches were selected  
73 randomly, with the requirement of sufficient signal strength inside the RF, i.e. above the median of  
74 the full distribution of  $(x_{1+}^2 + x_{1-}^2)$  on natural scenes, where  $x_{1+}$  and  $x_{1-}$  are the odd and even phases  
75 of the center vertical filter (see Methods). **E.** The Fano factor (FF; ratio between mean and variance) as  
76 a function of the mean for the same GSM simulation reported in **D.** Red dashed line represents the  
78 best linear fit. Pearson corr. 0.214,  $p < 10^{-4}$ .

92 and whether this modulation reflects the statistical properties of natural inputs.

93 Here we combine modeling and electrophysiology in macaques to test our hypothesis that V1  
94 variability is tuned to natural image statistics. First, we show analytically that the dependence  
95 between spike-count variance and mean observed empirically (Goris, Movshon, et al. 2014;  
96 Shadlen and Newsome 1998; Tolhurst, Movshon, et al. 1983) emerges in the GSM from the  
97 multiplicative interactions between local and global image features. Second, we show that  
98 stimuli in the RF surround modulate these interactions, and thus also response variability.  
99 Finally, we test predictions about surround modulation of firing rate and variability with  
100 recordings in V1 of awake and anesthetized macaques viewing natural images and gratings.

101 Our results show that visual context modulates neuronal response strength and variability  
102 independently, suggesting these modulations reflect probabilistic inference about local visual  
103 features. Our work thus provides evidence that the tuning of cortical variability can be  
104 explained assuming the brain performs operations of probabilistic inference of natural image  
105 statistics.

## 106 2 Results

### 107 2.1 The dependence between spike-count variance and mean reflects 108 multiplicative interactions between latent variables

109 To study the relation between natural image statistics and V1 cortical variability, we considered  
110 the GSM because it captures the most prominent aspects of low-level image statistics, namely  
111 the sparseness of V1-like, oriented visual features and their nonlinear statistical dependence  
112 (Schwartz and Simoncelli 2001; Wainwright, Simoncelli, et al. 2000). We assumed that the  
113 instantaneous firing of V1 neurons (Methods Eq. 4) represents samples from the inferred  
114 probability distribution (termed posterior distribution; Berkes, Orbán, et al. 2011; Orbán,  
115 Berkes, et al. 2016) of oriented visual features encoded by the neurons. The inference of the  
116 posterior distribution requires inverting the so-called generative model of stimuli: that is,  
117 how features — small patches with different orientations and positions — are combined to  
118 produce images (Fig. 1A). Given an input image, model neurons then encode the inferred  
119 probability distribution of the coefficients of those features in the image. This is illustrated  
120 schematically for a vertical feature in Fig. 1B-top. The posterior distribution (middle column)  
121 in this case was broad with a large mean, indicating that the vertical feature was strongly  
122 present in the input image, though its precise coefficient was uncertain. Conversely, the image  
123 in Fig. 1B-bottom contains little evidence for the vertical feature, leading to a narrow posterior  
124 centered on zero. In the sampling framework, neuronal responses represent samples from  
125 this posterior distribution (Fig. 1B, right column). Thus, the variance of the spike count  
126 distribution (i.e. the neuronal variability) reflects the variance or width of the posterior,  
127 corresponding to the uncertainty about the coefficient of the encoded feature.

128 We studied whether, in the GSM, response variance depends on response mean, as observed  
129 in V1 (Goris, Movshon, et al. 2014; Shadlen and Newsome 1998; Tolhurst, Movshon, et al.  
130 1983). The GSM assumes  $\mathbf{x} = \nu \mathbf{g}$  where the sensory input  $\mathbf{x}$  is the result of local features  
131  $\mathbf{g}$  (the variables encoded by the neurons) multiplied by a global modulator  $\nu$  (e.g. image  
132 contrast). To gain intuition about the mean–variance relationship of the model, we first  
133 considered the simplest formulation of a GSM, where  $\mathbf{x}$  and  $\mathbf{g}$  are 1-dimensional. Although  
134 the expression relating these quantities —  $x = \nu g$  — is deterministic, knowledge of  $x$  is  
135 insufficient to determine  $g$ , due to the unknown  $\nu$ . Computing the probability distribution of  $g$   
136 by accounting for the possible values of  $\nu$  is a fundamental operation of probabilistic inference,  
137 called marginalization (Beck, Latham, et al. 2011; Pouget, Beck, et al. 2013). Crucially, because  
138 of the multiplication, both the inferred value of  $g$  and its uncertainty (i.e. the mean and  
139 standard deviation of the posterior over  $g$ ) are divisively related to  $\nu$ . For instance, assume we  
140 observed  $x = 10$  and we inferred that  $\nu$  is likely to be between 1 and 2 (Fig. 1C, dark blue), then  
141 by marginalization we would infer that  $g$  is with high probability between 5 and 10 (Fig. 1C,  
142 light blue). If instead  $\nu$  was inferred to be in the interval 4–5 (Fig. 1C, dark brown), then  $g$   
143 could only take values between 2 and 2.5, thus shrinking both in mean and variance (Fig. 1C,

144 light brown). This example illustrates why a neuron whose responses reflect samples from  
145 the inferred distribution of  $g$  should display a dependence between mean and variance in its  
146 response statistics. Note that this dependency is not linear, nor do mean and variance strictly  
147 follow each other as they would in a Poisson process. In general, the relative scaling depends  
148 on model choices, such as the uncertainty on the priors and, for high dimensional inputs, the  
149 stimulus structure (as explained in the next section). Notice too that if the mixer term were  
150 additive instead of multiplicative, then changes in its inferred value would only change the  
151 inferred mean of  $\mathbf{g}$ , not its variance, leading to different predictions (Supplementary Fig. S1).

168 To validate this intuition more rigorously, we considered GSM inference on real images. As  
169 in past normative models (Coen-Cagli, Dayan, et al. 2012; Coen-cagli, Dayan, et al. 2009;  
170 Coen-Cagli, Kohn, et al. 2015; Schwartz and Simoncelli 2001), we implemented a GSM with  
171 oriented filters (Simoncelli and Freeman 1995) spatially arranged to define both the RF of  
172 the model neuron and its surround (Fig. 2A; details in Methods). The model was trained on a  
173 large ensemble ( $N=10,000$ ) of natural image patches extracted from the BSDS500 database  
174 (Arbelaez, Maire, et al. 2011, <https://github.com/BIDS/BSDS500>).

175 Given an input image, the visual inputs  $\mathbf{x}$  (a vector) were determined by the activations of  
176 those filters applied to the image. We denoted by  $\mathbf{g}$  the corresponding local visual features.  
177 First, we verified that the multiplicative effect of the modulator allows the GSM to capture  
178 the statistics of natural images (Wainwright, Simoncelli, et al. 2000) better than an additive  
179 modulator (Supplementary Fig. S1). We found through analytical derivations and simulations  
180 that the variance of the inferred  $\mathbf{g}$  grows with the mean, and both are divisively scaled by the  
181 estimate of the global modulator  $\nu$ , leading to a general reduction of uncertainty when the  
182 estimate of  $\nu$  increases (Methods Eq. 2, 3; see Supplementary Text for derivation). We then  
183 simulated model responses to a wide range of natural images (Fig. 1D), and characterized the  
184 mean–variance relation. The response variance of the model neuron scaled proportionally  
185 with its mean. Furthermore the ratio of variance to mean, termed Fano factor (FF), increased  
186 on average for stimuli that elicited stronger mean responses (Fig. 1E), in qualitative agreement  
187 with the statistics of V1 neurons (Goris, Movshon, et al. 2014). Importantly, training a GSM on  
188 different image sets, such as white noise, led to different parameter values but qualitatively  
189 similar predictions for neural responses (Supplementary Fig. S2), indicating that the mean-  
190 variance dependence arises from matching the generative model’s structure to image statistics  
191 (i.e. multiplicative latent interactions) rather than fine-tuning its parameters.

192 These analyses confirm the intuition that the dependence between posterior variance and  
193 mean observed in the GSM emerges from the multiplicative interactions between the global  
194 modulator and the local variables. Because this partition between local and global variables  
195 in the GSM is known to capture well the statistics of natural images (Schwartz and Simoncelli  
196 2001; Wainwright, Simoncelli, et al. 2000), our result establishes a precise link between image  
197 statistics and cortical variability.

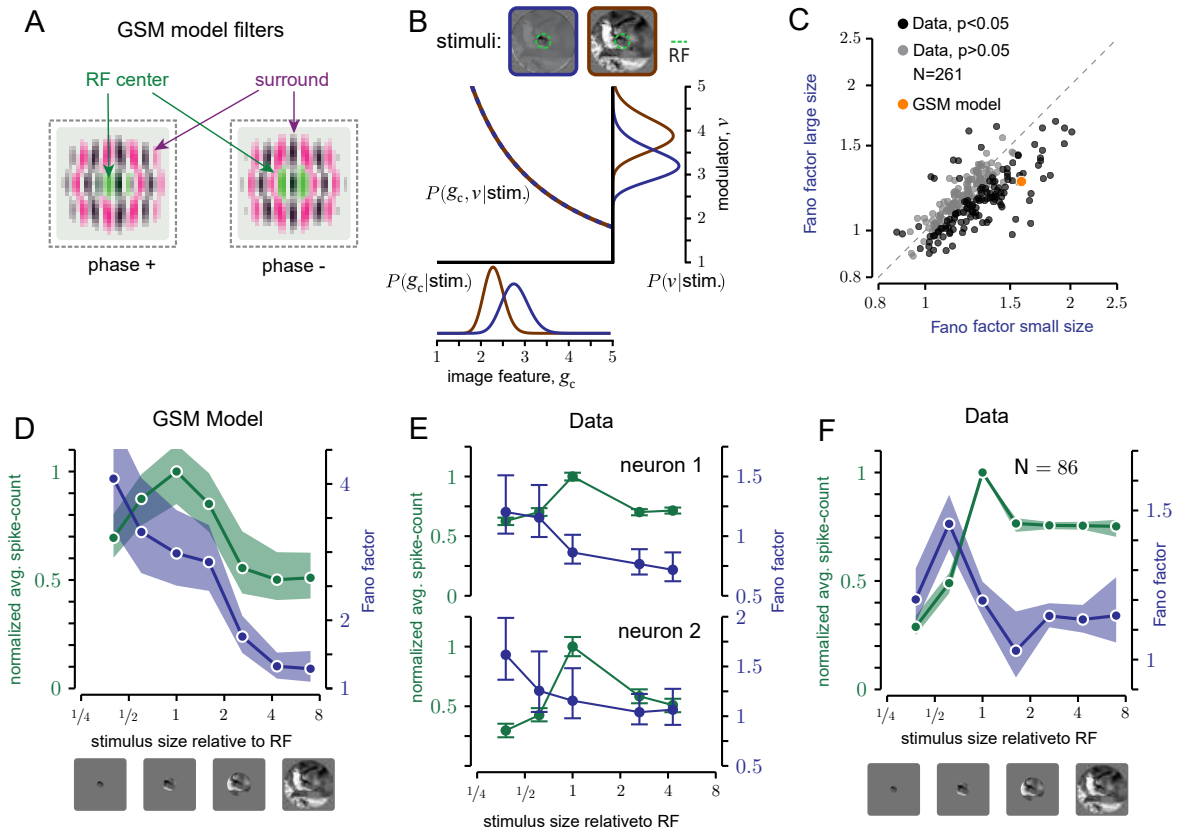

152

153 **Figure 2: Surround stimulation reduces GSM uncertainty and V1 variability for natural images.**

154 **A.** In the GSM, the inputs to the model neuron are provided by the activity of quadrature pairs of  
 155 oriented filters, corresponding to the spatial RF (green) and its surround (magenta). **B.** Noise-free  
 156 GSM model applied to an image without (blue) and with (brown) surround. The surround stimulus  
 157 does not change the constraint between  $g_c$  (the local feature associated with the RF center) and  $\nu$ , but  
 158 it influences the estimate of the modulator and therefore also the estimate of  $g_c$ . **C.** FF averaged across  
 159 small (1 deg) and large (3.1 or 6.7 deg) natural image patches. Black and gray circles: average FF across  
 160 images for each V1 neuron; black denotes a significant difference ( $p < 0.05$ ) across the two conditions.  
 161 Orange circle: average FF of the GSM response for the same set of images. For the conversion to spike  
 162 counts (see Methods, Eq. 4) we used the scaling factor  $c = 2$ . **D-F.** Tuning of the mean spike count  
 163 (green) and FF (blue), for natural image patches of varying size. **D.** GSM model, scaling factor  $c = 15$ .  
 164 This constant was different than in **C**, because the experiments of **C** used images with a broader range  
 165 of orientation and frequency content than **D**. **E, F.** Data from one awake fixating macaque V1, for two  
 166 example neurons **E** and the population average **F**. Error bars represent the 68% c.i.

## 198 **2.2 Surround stimulation reduces uncertainty and V1 variability**

199 The previous analysis shows that variability in the GSM is influenced by the inferred values  
200 of the global modulator. Therefore, the framework predicts that variability is sensitive to  
201 stimulus manipulations that affect the inferred global modulator. Specifically, stimuli that lead  
202 to a higher estimate of the modulator present less uncertainty over the hidden feature, and  
203 thus should reduce response variability. To test this prediction, we considered the modulation  
204 of V1 activity induced by spatial context — by stimuli in the surround of a neuron’s RF —  
205 because spatial context can reduce stimulus uncertainty without modifying the stimulus  
206 drive inside the RF (Albright and Stoner 2002).

207 First, we verified for the GSM that surround stimuli (i.e. image regions that activate the  
208 surround filters) reduce uncertainty. The activity of the model neuron is associated with  
209 the oriented feature in the center. However, the surround input contributes to the estimate  
210 of the global modulator, and therefore influences the neuronal response. Specifically, our  
211 analytical results show that, for a fixed RF input, surround stimulation increased the estimated  
212 modulator and therefore had a suppressive influence both on the mean and variance of the  
213 neuronal response (Fig. 2B; Methods), validating our intuition that surround stimuli reduce  
214 uncertainty by resulting in a higher estimate of the global modulator.

215 Next, we tested whether surround stimulation reduces V1 variability, relative to RF stimulation  
216 alone, by analyzing previously published data on V1 surround modulation in anesthetized  
217 macaques (Coen-Cagli, Kohn, et al. 2015). In these experiments, natural image patches  
218 were presented at two different sizes, either masked to fit within the average RF (1 degree),  
219 or extending well beyond into the surround (3.1-6.7 degrees). Among the neurons with a  
220 significant change in FF across conditions (127/261 neurons,  $p < 0.05$ ), the vast majority  
221 (91.3%) had a lower FF for large images than small ones, consistent with model predictions.  
222 The average FF, across all neurons, was also lower for large images than small ones (1.15  
223 versus 1.22,  $p < 10^{-6}$ ,  $N = 261$  neurons). We verified with a mean-matching analysis that this  
224 difference in FF could not be explained by differences in spike-count mean (Supplementary  
225 Fig. S3). This result agrees qualitatively with the model (Fig. 2C, orange symbol), although  
226 surround suppression of FF was stronger in the model, possibly because surround modulation  
227 in the GSM is recruited by all images, whereas in V1 it is weak or absent for many images  
228 (Coen-Cagli, Kohn, et al. 2015). Consistent with this possibility, the strength of surround  
229 suppression of responsivity and of FF were positively correlated (Supplementary Fig. S4).

## 230 **2.3 Distinct effects of RF and surround stimulation on variability suppression**

231 Suppression of response variability by large stimuli might not be due solely to surround  
232 stimulation. Visual stimuli reduce the variability seen in spontaneous activity (Churchland,  
233 Yu, et al. 2010). Therefore large images might reduce variability by providing stronger drive



234 to the RF, in those cases where small images did not completely cover the RF. To test whether  
235 stimuli larger than the RF induced further reduction of the FF, beyond the reduction caused  
236 by the stronger RF drive, we considered responses to circular patches of natural images, with  
237 sizes ranging from much smaller to much larger than the typical RF.

238 We first studied the effects of stimulus size in the GSM. We found that the mean response  
239 peaked for images matched in size to the RF and decreased for larger stimuli, consistent with  
240 past work (Coen-Cagli, Dayan, et al. 2012). The FF, on the other hand, decreased monotonically  
241 with stimulus size, well after the stimulus filled the RF (Fig. 2D), because large stimuli lead to  
242 a larger estimate of the global modulator (Supplementary Fig. S5A). The difference between  
243 the behavior of the FF and the mean indicates that it should be possible to dissociate the  
244 effects of variability reduction from the modulation of spike-count mean: stimuli smaller  
245 than the RF and larger than the RF can elicit similar average responses but with different  
246 variability.

247 We tested these predictions in V1 responses to natural images of different sizes in one awake  
248 fixating macaque. For the two example neurons of Fig. 2E, the mean spike count displayed the  
249 typical non-monotonic size dependence (green), whereas the FF decreased monotonically  
250 (blue). Similar effects were evident across all recorded neurons for stimuli ranging from  
251 approximately half the RF size up to several times larger ( $N = 86$ ; Fig. 2F). The FF decreased  
252 by 18.7% as stimuli increased from approximately  $1/2$  RF size to RF size, and an additional  
253 5.7% as stimuli increased from RF size to approximately twice that size (Table 1, left), which is  
254 the average extent of the suppressive surround in V1 (Angelucci, Levitt, et al. 2002; Cavanaugh,  
255 Bair, et al. 2002a; Sceniak, Ringach, et al. 1999). Furthermore, the FF decreased for stimuli  
256 larger than the RF compared to stimuli smaller than the RF, even when both stimuli evoked  
257 approximately the same number of spikes (Table 1, right). To be sure that our results were  
258 not affected by inaccurate estimates of RF size, due to variations in local contrast across  
259 natural images, we measured responses to static gratings in the same animal, and obtained  
260 similar results (Table 1, experiment 2; Supplementary Fig. S6A). New analyses of previously  
261 published data from anesthetized animals (Coen-Cagli, Kohn, et al. 2015) also confirmed  
262 these results (Table 1, experiment 3; Supplementary Fig. S6), ruling out the possibility that  
263 microsaccades in the awake animals might have introduced biases.

264 Note that the FF was lower on average for stimuli smaller than  $1/2$  RF size (Fig. 2F, leftmost  
265 point). This was true for the subset of neurons with large RF ( $N = 65/86$ ), whereas the  
266 FF decreased strictly monotonically for neurons with smaller RFs (Supplementary Fig. S7).  
267 Both the large apparent RF size and the non-monotonicity of the FF would be expected if  
268 stimuli were not perfectly centered on the RF (Supplementary Fig. S8). Furthermore, the FF  
269 decreased monotonically with stimulus size in the anesthetized dataset, for which stimulus  
270 centering could be controlled more tightly (Supplementary Fig S7).

271 These analyses show that stimulation of the RF surround reduces response variability, beyond  
272 the known reduction from spontaneous to stimulus-driven activity (Churchland, Yu, et al.

| Experiment                                                     | FF decrease<br>( $1/2$ RF) – (RF) | FF decrease<br>(RF) – ( $2 \times$ RF) | $p$ -value  | Mean-matched FF<br>decrease (size ><br>RF) – (size < RF) | $p$ -value  |
|----------------------------------------------------------------|-----------------------------------|----------------------------------------|-------------|----------------------------------------------------------|-------------|
| 1. Natural, awake<br>( $N = 86$ ; Fig. 2F)                     | 18.7%                             | 5.7%                                   | 0.082       | 25.7%                                                    | $< 10^{-5}$ |
| 2. Gratings, awake<br>( $N = 19$ ;<br>Supp. Fig. S6)           | 31.7%                             | 9.0%                                   | 0.05        | 47.7%                                                    | $< 10^{-3}$ |
| 3. Gratings,<br>anesthetized<br>( $N = 229$ ;<br>Supp. Fig S6) | 14.2%                             | 7.05%                                  | $< 10^{-3}$ | 22.6%                                                    | $< 10^{-5}$ |

**Table 1: Rows.** Separate experiments, with number of neurons selected in each experiment (selection criteria in Methods). **Columns.** Columns 1-3, changes in FF with stimulus size; columns 4 and 5, mean-matched (see Methods) change in FF with stimulus size. In all cases, a positive change denotes a reduction in FF for larger stimuli. First column: change in FF (Methods, Eq. 5) from the stimulus closest to  $1/2$  of the RF size (out of all tested sizes) to the RF-sized stimulus. Second column: change in FF from the RF-sized stimulus to the large stimulus (closest to 2 RF size). Third column: the  $p$ -value for the second column. Fourth column: FF change from stimuli smaller to larger than RF size. Sizes are selected to match the mean spike count across neurons (spike count change  $< 3\%$ ,  $p > 0.05$ , for all experiments). Fifth column:  $p$ -value for the fourth column.

273 2010).

## 282 2.4 Surround suppression of variability is orientation selective

283 Surround suppression of mean firing rate is known to be stronger for image patches with  
284 matched orientation inside and outside the RF, and weaker when the surround orientation is  
285 orthogonal to the center (Angelucci, Bijanzadeh, et al. 2017; Cavanaugh, Bair, et al. 2002b;  
286 Gardner, Anzai, et al. 1999; Sillito and Jones 1996; Walker, Ohzawa, et al. 1999; Webb, Dhruv,  
287 et al. 2005). It is not known whether variability is similarly tuned. In our GSM model, surround  
288 tuning of mean responses (Fig. 3A, green) was obtained by using surround filters with the  
289 same orientation as the feature of interest inside the RF (details in Methods), as in past  
290 implementations (Coen-cagli, Dayan, et al. 2009; Schwartz and Simoncelli 2001).

291 Because the GSM predicts that surround suppression of both mean spike-counts and vari-  
292 ability is controlled by the inferred strength of the global modulator, we found that surround  
293 suppression of model response variability and of mean spike-counts were similarly tuned  
294 (Fig. 3A). We verified that this corresponded to a smaller estimate of the global modulator  
295 for orthogonal surround stimuli (Supplementary Fig. S5B), which in turn resulted in weaker  
296 surround suppression of variability.

297 To test these model predictions, we measured V1 responses to compound static gratings

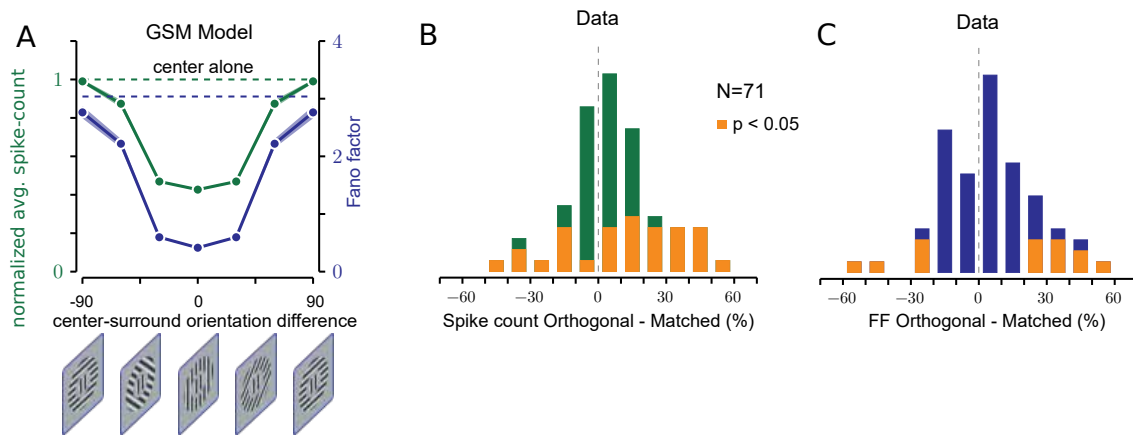

274

275 **Figure 3: Surround reduction of variability is orientation tuned.** A. Surround orientation tuning of  
 276 the mean spike count (green line) and FF (blue line), relative to the center stimulus alone (dashed  
 277 lines) in the GSM model. Error bars: 68% c.i. scaling factor (Methods Eq. 5). B,C. Percent change in  
 278 the mean spike count B and Fano factor C from orthogonal to matched surround orientation, in V1 of  
 279 two awake fixating macaques. Yellow bars denote neurons with a significant change across conditions.  
 280 The difference is considered significant when the 68% c.i.'s of the two conditions do not overlap.

298 in two awake, fixating macaques ( $N = 71$  neurons). Consistent with past literature, the  
 299 mean response was suppressed (relative to no surround) more when the surround and center  
 300 orientations were matched (Fig. 3B; average suppression matched 0.844, orthogonal 0.885;  
 301 average reduction 6.28%,  $p = 0.0043$ ). In agreement with model predictions, the FF was  
 302 smaller for the matched surround (Fig. 3C; average FF matched 0.973, orthogonal 1.02; average  
 303 reduction 4.73%,  $p = 0.032$ ), and this was true in the majority ( $N = 9/14$ ) of neurons with  
 304 a significant change ( $p < 0.05$ ). However, although consistent with the GSM prediction,  
 305 the magnitude of the effect was small (see also Discussion). One reason might be that, in  
 306 our data, 26/71 neurons responded more strongly to parallel than orthogonal surrounds  
 307 (i.e. opposite to the surround tuning of our GSM implementation), which may be due both  
 308 to imperfect stimulus centering and to the known heterogeneity in the orientation tuning  
 309 of surround suppression of firing rate (Cavanaugh, Bair, et al. 2002b). Consistent with this  
 310 explanation, we verified that if we restricted our analysis to neurons that responded more  
 311 weakly to parallel than orthogonal surround ( $N = 45/71$ ; average reduction 17.3%,  $p < 10^{-5}$ ),  
 312 the surround tuning of FF was also stronger (average reduction 7.37%,  $p = 0.013$ ) than for  
 313 the entire population (Supplementary Fig. S9).

314 Our analysis shows that surround suppression of variability in V1 is tuned to the orientation  
 315 of surround stimuli, in a manner similar to the tuning of firing rate suppression, suggesting  
 316 partly shared mechanisms. In the GSM framework, this tuning arises because only matched  
 317 surround stimuli provide information about the global modulator and thus reduce uncertainty.

## 318 **3 Discussion**

319 We have presented a theoretical framework that explains V1 variability and its modulation by  
320 spatial context in natural images, as reflecting probabilistic inference about local features in  
321 visual inputs. Our work builds on the theory of neural sampling (Fiser, Berkes, et al. 2010;  
322 Haefner, Berkes, et al. 2016; Hoyer and Hyvärinen 2003; Orbán, Berkes, et al. 2016), in which  
323 neuronal variability encodes uncertainty of the inferences, and offers two main contributions.  
324 First, we established a precise link between V1 response variability and the statistics of  
325 natural images. We showed that the dependence between spike-count variance and mean,  
326 and the modulation of variability by spatial context are general consequences of probabilistic  
327 inference when there are multiplicative interactions between latent variables, which is a  
328 widely-adopted description of natural image statistics (Coen-Cagli, Dayan, et al. 2012; Dayan  
329 and Abbott 2005; Gao and Vasconcelos 2007; Geisler 2008; Schwartz and Simoncelli 2001;  
330 Wainwright, Simoncelli, et al. 2000). Second, we validated our model with measurements  
331 of V1 activity. Consistent with model predictions, spatial context in images modulated V1  
332 variability beyond the known reduction of variability from spontaneous to stimulus-driven  
333 activity (Churchland, Yu, et al. 2010). Furthermore, the tuning of contextual modulation of  
334 variability was similar to (although weaker than) that of mean spike counts, suggesting shared  
335 mechanisms.

### 336 **3.1 Natural image statistics and contextual modulation of response variability**

337 Normative models of visual processing have explained properties of V1 representations from  
338 optimization and efficiency principles related to the statistics of the natural environment  
339 (Bell and Sejnowski 1997; Hyvärinen and Hoyer 2000; Karklin and Lewicki 2009; Olshausen  
340 and Field 1996; Rao and Ballard 1999; Schwartz and Simoncelli 2001). This work has typically  
341 addressed only the trial-averaged spike counts. However, across-trial variability is substantial  
342 in cortex and can strongly influence perception (Kohn, Coen-Cagli, et al. 2016; Moreno-Bote,  
343 Beck, et al. 2014; Pouget, Beck, et al. 2013; Shadlen and Newsome 1998). Understanding  
344 cortical processing requires addressing this variability, which we have done via the neural  
345 sampling theory.

346 The hypothesis that neuronal variability reflects sampling from a distribution (Hoyer and  
347 Hyvärinen 2003) is rooted in machine learning research focused on efficient inference  
348 schemes (Bishop 2006). Past work in neural network modeling has shown how samples  
349 might be generated dynamically, and in a manner that is fast enough for accurate inference  
350 within short, biologically relevant timescales (Echeveste, L. Aitchison, et al. 2020; Hennequin,  
351 Laurence Aitchison, et al. 2014; Legenstein and Maass 2014; Savin and Denève 2014).

352 While past work has addressed the plausibility of neural sampling, we have focused instead on  
353 contextual effects, for two important reasons. First, contextual effects disambiguate between

354 two key aspects of neural coding: the strength of the stimulus feature represented by the  
355 neuron, and the uncertainty about that feature. This is because stimuli in the RF surround do  
356 not directly affect the inputs to the RF, but they can modulate uncertainty. This is different  
357 from contrast modulation (Orbán, Berkes, et al. 2016) and other common experimental  
358 manipulations (e.g. adding stimulus noise; Britten, Shadlen, et al. 1992; Nienborg and  
359 Cumming 2014), that modulate both the strength of a visual feature and its uncertainty. Second,  
360 natural visual inputs have rich statistical structure that extends across the visual field. There  
361 is abundant evidence suggesting a relation between spatial structure in images and spatial  
362 contextual effects in cortex (Coen-Cagli, Kohn, et al. 2015; Rao and Ballard 1999; Schwartz  
363 and Simoncelli 2001; Spratling 2010; Zhu and Rozell 2013). Contextual modulation of V1  
364 trial-averaged responses has been characterized extensively with artificial stimuli (Angelucci,  
365 Levitt, et al. 2002; Cavanaugh, Bair, et al. 2002a,b; Sceniak, Ringach, et al. 1999; Sillito and  
366 Jones 1996; Walker, Ohzawa, et al. 1999), and is also prominent for natural inputs (Haider,  
367 Krause, et al. 2010; Vinje and Gallant 2000). Past work using the GSM and its extensions has  
368 explained a wide range of those phenomena, as reflecting a computation optimized to the  
369 statistics of natural images (Coen-Cagli, Dayan, et al. 2012; Coen-cagli, Dayan, et al. 2009;  
370 Schwartz and Simoncelli 2001). The modeling and experimental results presented here are  
371 consistent with this prior work, as we report strong and tuned surround suppression of mean  
372 spike-counts (Fig. 2D-F, Fig. 3). But our findings go beyond this previous work, by establishing  
373 a general relation between response variability and natural image statistics (Fig. 1C) and  
374 relating surround influences on mean spike counts and on variability (Fig. 2D-F, Fig. 3).

375 Our model could be further extended to account for the fact that contextual modulation is weak  
376 or absent for some stimuli, such as when contextual inputs are not informative (Coen-Cagli,  
377 Kohn, et al. 2015). Variability reduction by stimulus context should be weaker or absent for  
378 such uninformative contextual stimuli, which would be consistent with our observations that,  
379 when we used natural images, the level of surround suppression of FF varied substantially  
380 across images (Fig. 2C and Supplementary Fig. S4), and that suppression was also weaker  
381 for orthogonal grating surrounds (Fig. 3C). Although V1 responses agreed well with model  
382 predictions, we observed a quantitative discrepancy between the two: contextual modulation  
383 of FF and its tuning were much stronger in the model. This could reflect that, in the model, the  
384 main source of uncertainty (particularly for the high-contrast stimuli we used), and therefore  
385 variability, is the unknown value of the global modulator. Model response variability is  
386 therefore extremely sensitive to contextual stimuli. In V1, there are likely multiple latent  
387 sources of uncertainty that could partly mask the effects of our experimental manipulation of  
388 spatial context. Addressing this discrepancy may require considering non-sensory contextual  
389 factors such as attention and behavioral state (Haefner, Berkes, et al. 2016; Rabinowitz, Goris,  
390 et al. 2015).

### 391 **3.2 Influences of divisive normalization on variability and other response** 392 **statistics**

393 Our mathematical analysis of the GSM inference shows that, in the model, response strength  
394 and variability are jointly modulated by divisive normalization (Carandini and Heeger 2012;  
395 Heeger 1992). This is because the mean and variance of the inferred distribution of the  
396 local features depend divisively on the inferred value of the global modulator (Methods,  
397 Eq. 3), which in turn is obtained by combining the inputs corresponding to all features  
398 (Methods Eq. 2; Coen-Cagli, Dayan, et al. 2012). Therefore, our model points to divisive  
399 normalization as the key operation for surround modulation of rate and variability. There is  
400 abundant indirect evidence that normalization modulates responses beyond firing rate. For  
401 instance, stimulus manipulations that engage normalization, such as varying contrast and  
402 size (Cavanaugh, Bair, et al. 2002b; Heeger 1992), also modulate variability (Haider, Krause,  
403 et al. 2010; Kohn and Smith 2005; Snyder, Morais, et al. 2014). In addition, although the  
404 mechanisms of normalization are debated, network models based on inhibitory stabilization  
405 (Y. Ahmadian, D. B. Rubin, et al. 2013) reproduce many of those stimulus-induced effects,  
406 indicating a common mechanism that could control both firing rate (Hennequin, Yashar  
407 Ahmadian, et al. 2018; Daniel B. Rubin, Hooser, et al. 2015) and variability (Hennequin, Yashar  
408 Ahmadian, et al. 2018) consistently with normalization.

409 Other work has established the connection between normalization and variability more  
410 directly. A descriptive model of stochastic normalization has been shown to fit changes  
411 in variability with stimulus contrast (Coen-Cagli and Solomon 2019) and orientation noise  
412 (Henaff, Boundy-Singer, et al. 2020), and revealed that, even for fixed stimuli, variability is  
413 reduced during epochs of strong normalization (Coen-Cagli and Solomon 2019). Our analytical  
414 results on normalization and variability bridge the gap between this literature and a theory  
415 of the computational role of variability.

### 416 **3.3 Relation to other descriptive models and functional explanations of** 417 **cortical variability**

418 Previous work used a GSM to demonstrate stimulus dependent changes in response statistics  
419 (Orbán, Berkes, et al. 2016). In particular, Orbán, Berkes, et al. (2016) suggested that a GSM  
420 could unify effects of response mean and variability. Our work extends this study in two im-  
421 portant aspects. First, Orbán and colleagues used approximate inference in their GSM, based  
422 on a maximum a posteriori estimate for the global scaling variable. Consequently, posterior  
423 variance was exclusively due to observation noise, while variance resulting from uncertainty  
424 in the global scaling variable was ignored. This required tuning a nonlinear conversion from  
425 membrane potential to spike counts to account for realistic response variability (Carandini  
426 2004). Here, we include both sources of uncertainty — input noise and the unknown global  
427 latent variable — and we show that the GSM framework is sufficient to capture the dependence

428 between response mean and variance for a wide range of inputs (Fig. 1C,D), without further  
429 tuning the conversion from membrane potential to spikes. Second, the treatment of Orbán  
430 et al was sufficient for a coarse grained account of contextual effects (such as changes in  
431 sparseness and reliability), but our analysis unveils a more complex repertoire of contextual  
432 effects for natural images, leading to detailed predictions that related statistical dependencies  
433 across visual space to contextual modulation of V1 variability.

434 Another recent model (Henaff, Boundy-Singer, et al. 2020) proposes that uncertainty is repre-  
435 sented in the response variability, and is thus related to sampling and to our work. However,  
436 they propose that variability is partitioned into two terms, Poisson variability and fluctua-  
437 tions in response gain (Goris, Movshon, et al. 2014). Uncertainty is encoded specifically by  
438 the amplitude of the gain fluctuations. Different from our work, the Poisson term in that  
439 framework does not have a functional role and is left unexplained, and there is no precise  
440 relation between V1 variability and the statistics of natural images. In addition, whereas  
441 sampling-based representations can approximate the full posterior distribution, the model of  
442 Henaff, Boundy-Singer, et al. (2020) focuses only on the mean and variance (uncertainty) of  
443 the posterior. Therefore, future experimental work could further distinguish between these  
444 theories by comparing higher-order statistics of V1 responses to the corresponding statistics  
445 in the visual inputs.

## 446 **4 Methods**

### 447 **4.1 Model of V1 responses**

#### 448 **The Gaussian Scale Mixture (GSM) generative model**

449 The observable variables are given by the outputs of linear, oriented filters (Simoncelli and  
450 Freeman 1995) applied to grayscale input images. We assume oriented filters because they  
451 approximate well those optimized to natural images, and also represent a canonical choice for  
452 V1 models that used the GSM framework (Coen-Cagli, Dayan, et al. 2012; Coen-cagli, Dayan,  
453 et al. 2009; Coen-Cagli, Kohn, et al. 2015; Echeveste, L. Aitchison, et al. 2020; Orbán, Berkes,  
454 et al. 2016). One pair of filters (even and odd phase, forming a quadrature pair) represents  
455 the RF of the model neuron, and another 8 pairs are uniformly distributed on a circle around  
456 the RF, all with the same orientation (represented in Fig. 2A as vertical). The surround filters  
457 slightly overlap with the RF filters, to reflect that suppressive surround mechanisms in V1  
458 partly overlap with the RF (Cavanaugh, Bair, et al. 2002a) (see Fig. 2A). The responses of the  
459 18 filters form a 18-dimensional input vector, denoted as  $\mathbf{x}$ .

460 The generative model uses latent variables to capture the statistics of  $\mathbf{x}$ , as follows:

$$\mathbf{x} = \nu \mathbf{g} + \boldsymbol{\eta} \tag{1}$$

461  $\mathbf{g} \sim \mathcal{N}(0, C_g)$  ;  $\nu \sim \text{Rayleigh}(1)$  ;  $\boldsymbol{\eta} \sim \mathcal{N}(0, C_{\text{noise}})$

462 The observable  $\mathbf{x}$  results from the product of the feature vector  $\mathbf{g}$ , which has the same dimen-  
463 sionality of  $\mathbf{x}$ , and a positive scalar  $\nu$ , that acts as global modulator. The additive noise  $\boldsymbol{\eta}$  plays  
464 the role of observation noise in the generative model. That is, it accounts for the fact that  
465 the GSM is not a perfect model of the statistics of the observable  $\mathbf{x}$  on natural images. As we  
466 explain below, this additive noise is also helpful to account for realistic response variability  
467 with weak stimuli (Supplementary Fig. S10). We assume that  $\mathbf{g}$  and  $\boldsymbol{\eta}$  are generated from  
468 multivariate normal distributions, with mean 0 and covariances  $C_g$  and  $C_{\text{noise}}$ , respectively;  $\nu$   
469 follows a Rayleigh distribution with mean 1. Note that changing the Rayleigh parameter is  
470 equivalent to rescaling  $C_g$ .

### 471 **Model optimization**

472 The covariance of the noise term, denoted as  $C_{\text{noise}}$  in Eq. 1, is found numerically, by applying  
473 the filters to 10,000 white-noise patches. We take the empirical covariance of the resulting  
474 outputs and scale it by a free parameter, set heuristically at 0.1 to ensure a realistic response  
475 variability for weak inputs (Supplementary Fig. S10). The covariance matrix  $C_g$  is computed  
476 by moment-matching (Doulgeris and Eltoft 2009), based on the empirical covariance of filter  
477 outputs over 10,000 natural image patches, scaled by a term that accounts for the mixer. This  
478 ensures that the model is adapted to natural image statistics, as in previous work (Coen-  
479 Cagli, Dayan, et al. 2012). The image patches used for training are considered noise-free,  
480 and the noise level in the trained model is tuned heuristically. This choice was motivated by  
481 convenience, and by noticing that pixel noise tended to be small, reflecting the digital quality  
482 of images and not indicative of sensory noise.

### 483 **Probabilistic inference and sampling**

484 Having defined the generative process, we can express the posterior distribution of the  
485 latent feature of interest, for example the center-vertical feature with odd spatial phase,  
486  $g_{1+}$ , given the filters response  $\tilde{\mathbf{x}}$  to a test image. This quantity is denoted  $P(g_{1+} | \tilde{\mathbf{x}})$ , and  
487 results from an operation of Bayesian inference and marginalization over the other latent  
488 variables (Supplemental Text, Section 1). In particular, the global modulator plays a key role  
489 in the inference of  $g_{1+}$ . To gain further insight, we first derived analytical solutions for the  
490 regime in which input noise is negligible, i.e.  $\boldsymbol{\eta} = 0$ . First, can be expressed analytically and



491 approximated (Supplemental Text, Section 4) as:

$$492 \quad \mathbb{E}[\nu|\tilde{\mathbf{x}}] = \sqrt{\lambda} (1 + \mathcal{O}(\lambda^{-1})) \quad , \quad \text{with} \quad \lambda = \sqrt{\sum_{i,j} (C_g^{-1})_{i,j} \tilde{x}_i \tilde{x}_j} \quad (2)$$

493 where  $\mathcal{O}(\lambda^{-1})$  represents a generic function that drops to zero asymptotically with  $\lambda^{-1}$ . This  
 494 shows that the estimate of the mixer depends on the outputs of all filters. Second, the  
 495 distribution of the feature of interest,  $P(g_{1+}|\tilde{\mathbf{x}})$ , can also be expressed in closed-form in the  
 496 low-noise limit (Supplemental Text, Section 4). Its mean and Fano factor can be approximated  
 497 as:

$$498 \quad \mathbb{E}[g_{1+}|\tilde{\mathbf{x}}] = \frac{\tilde{x}_{1+}}{\sqrt{\lambda}} (1 + \mathcal{O}(\lambda^{-1})) \quad , \quad \text{and} \quad \text{FF}[g_{1+}|\tilde{\mathbf{x}}] = \frac{\tilde{x}_{1+}}{4\lambda\sqrt{\lambda}} (1 + \mathcal{O}(\lambda^{-1})) \quad (3)$$

499 In the approximation above (derived in Supplemental Text, Section 4), the expected value  
 500 of the feature of interest depends linearly on the input inside the RF,  $\tilde{x}_{1+}$ . However it is  
 501 scaled by  $\sqrt{\lambda}$ , a quantity approximately equal to the expected value of the global modulator  
 502 (Eq. 2), which includes the influence of the surround. The variance instead scales divisively  
 503 with the square of  $\lambda$ , which in turn determines the reduction of variability (the FF in Eq. 3)  
 504 by surround stimulation. This analysis thus shows that, in the GSM inference, divisive nor-  
 505 malization influences both the mean and the variance of the posterior distribution, thus  
 506 providing a normative explanation for the dependence between spike-count variance and  
 507 mean observed in sensory neurons. Notice also that the expected value and the FF are not  
 508 always monotonically related, because  $\lambda$  depends both on inputs inside and outside the RF,  
 509 and appears with different exponents in the FF and expected value. For instance, surround  
 510 stimulation affects only  $\lambda$  and thus changes the FF and expected value in the same direction,  
 511 whereas changing contrast affects both numerator and denominator resulting in opposite  
 512 scaling of the expected value and FF.

513 The analytical results in Eq. 3 refer to the reduced model without additive noise. In this  
 514 formulation, for very small inputs  $\tilde{\mathbf{x}} \approx 0$  the inferred mean and variance converge to zero,  
 515 resulting in model neurons with an unrealistically silent and very stable baseline activity.  
 516 We therefore extended the generative model to non-zero additive noise, and determined  
 517 the model neuron responses numerically, by Monte Carlo sampling, implemented through  
 518 the Stan programming language (<https://mc-stan.org/>). When comparing the analytical  
 519 solution for the noiseless model with the simulation results for the full model, we found that,  
 520 as expected, they differ predominantly in the regime of small inputs, where the model with  
 521 noise still preserves a non-zero response and variability (Supplementary Fig. S10).

522 Our choice of a fixed Rayleigh prior for the mixer (in line with past work; Coen-Cagli, Dayan,  
 523 et al. 2012; Coen-cagli, Dayan, et al. 2009; Coen-Cagli, Kohn, et al. 2015; Schwartz, Sejnowski,  
 524 et al. 2006) is mainly due to mathematical convenience, as it allows us to obtain analytical  
 525 insights on the scaling of mean and variance with  $\tilde{x}_{1+}$  and  $\lambda$ . Although we focused here  
 526 on qualitative predictions, for quantitative fits of GSM models to neural data one could  
 527 leverage the flexibility afforded by modifying the mixer prior and introducing additional free  
 528 parameters.

## 529 Conversion to spike counts

530 For the purpose of our analysis, in Eq. 3  $\tilde{x}_{1+}$  is assumed greater than 0 (e.g. a grating stimulus  
531 in-phase with the filter). To cover the general case, and appropriately express neural response  
532 and FF in terms of spike counts, we performed the following transformation:

$$533 \quad r = c \sqrt{g_{1+}^2 + g_{1-}^2} \quad (4)$$

534 where  $c$  is a fixed parameter set heuristically so that mean responses and FF are in a realistic  
535 range (values are reported in the figure captions), and the  $\pm$  represent the two spatial phases  
536 at the RF position. One strength of this framework (following Orbán, Berkes, et al. 2016)  
537 is that it is a fully normative model of response variability, and does not need to assume  
538 additional noise in the spiking process. We can therefore directly consider the instantaneous  
539 response  $r$  as a spike count, with a rounding error that is small for sufficiently high  $c$ . In  
540 the no-noise approximation, the mean and variance of  $r$  can be expressed analytically, and  
541 preserve the behavior of Eq. 3 (see Supplemental Text, Section 5). For the full model, we  
542 compute a single-trial response  $r$  for each sample of  $g_{1+}$ ,  $g_{1-}$ . The mean, variance and FF of  
543 the model neuron are then found numerically, using 400 samples.

544 The simple form of Eq. 4 allows for analytical results that provide useful intuitions. However,  
545 when testing the GSM response to stimuli of fixed size, we found that an increase in contrast led  
546 to a decrease in variance, in conflict with V1 data (Supplementary Fig. S11A,B). This behavior  
547 can be easily corrected (Supplementary Fig. S11E,F) by using a different transformation  
548 between the latent variable  $\mathbf{g}$  and the neural response  $r$ , in the form of a rectified expansive  
549 nonlinearity (Orbán, Berkes, et al. 2016). Note however that the GSM predictions for size  
550 tuning and surround-orientation tuning stimuli are qualitatively robust to the specific choice  
551 of transformation (Supplementary Fig. S12).

## 552 4.2 Neurophysiology

### 553 Animal preparation and data collection

554 We recorded data from male adult macaque monkeys (*Macaca fascicularis*), either anes-  
555 thetized (3 animals) or awake (2 animals). The protocol and general methods employed for  
556 the anesthetized experiments have been described previously (Smith and Kohn 2008). In  
557 short, anesthesia was induced with ketamine (10 mg/kg of body weight) and maintained  
558 during surgery with isoflurane (1.5–2.5% in 95% O<sub>2</sub>), switching to sufentanil (6–18  $\mu\text{g}$ /kg per  
559 h, adjusted as needed) during recordings. Eye movements were reduced using vecuronium  
560 bromide (0.15 mg/kg per h). Temperature was maintained in the 36–37 C° range, and relevant  
561 vital signs (EEG, ECG, blood pressure, end-tidal PCO<sub>2</sub>, temperature, and airway pressure)

562 were monitored continuously to ensure sufficient level of anesthesia and well-being. We  
563 implanted a  $10 \times 10$  multielectrode array (400 spacing, 1-mm length) in V1.

564 For awake experiments the animal was first familiarized with a restraining chair (Crist In-  
565 struments). Then a titanium headpost was implanted under full isoflurane anesthesia in an  
566 aseptic environment. Postoperative analgesic (buprenorphine) and antibiotic (enrofloxacin)  
567 were provided. After a six week recovery period, the animal was trained to fixate in a  $1 \text{ deg} \times$   
568  $1 \text{ deg}$  window. Eye position was monitored with a high-speed infrared camera (Eyelink, 1000  
569 Hz). Once sufficient performance was reached, a second surgery was performed in which  
570 a craniotomy and durotomy were performed over the occipital cortex. A 96-channel and a  
571 48-channel microelectrode array were implanted in V1 (and a third, 48-channel array in V4,  
572 not considered here). The dura was sutured over the arrays and covered with a gelatin film  
573 (Duragen). The craniotomy was covered with titanium mesh, held in place with titanium  
574 screws. On the first day of recording we mapped the spatial receptive fields of the sampled  
575 neurons by presenting small patches of drifting full contrast gratings (0.5 deg diameter; 4  
576 orientations, 1 cycle/deg, 3 Hz drift rate, 250 ms presentation) at 25 distinct positions spanning  
577 a  $3 \text{ deg} \times 3 \text{ deg}$  region of visual space. Subsequent stimuli were centered in the aggregate RF  
578 of the recorded units.

579 All procedures were approved by the Albert Einstein College of Medicine and followed the  
580 guidelines in the United States Public Health Service Guide for the Care and Use of Laboratory  
581 Animals.

#### 582 **4.2.1 Visual stimuli**

583 Visual stimuli were generated with custom software (EXPO) and displayed on a cathode ray  
584 tube monitor (Hewlett Packard p1230;  $1024 \times 768$  pixels, with cd/mean luminance and 100  
585 Hz frame rate) viewed at a distance of 110 cm (for anesthetized) or 60 cm (for awake). In  
586 each session, stimuli were randomly interleaved, separated by a uniform gray screen (blank  
587 stimulus). All grating stimuli were presented at 100% contrast.

588 **Surround modulation experiments.** We measured surround modulation in anesthetized  
589 animals with grayscale natural images (as described in [Coen-Cagli, Kohn, et al. 2015](#)). Briefly,  
590 we presented 270 images in total, each at two sizes (1 degree and 3.1-6.7 degrees). These  
591 included 90 distinct images. For images with a dominant orientation, we presented four  
592 variants rotated in steps of 45 degrees, to increase the probability that each variant would  
593 drive at least some of the recorded neurons. Images were presented for 200 ms followed by  
594 100 ms blank screen in pseudo-random order, each repeated 20 times.

595 **Size tuning experiments.** We measured size tuning with grayscale natural images, and both  
596 static and drifting gratings (Table 1 and Supplement Fig. S6). In each session of the awake  
597 experiments, we presented 10 natural images (a subset of the 270 described above) masked by

598 a circular window with diameters of 0.34, 0.55, 0.90, 2.4 and 3.8 deg , with stimulus duration  
599 200 ms and inter-stimulus interval of 100 ms. Images were presented 60-74 times each. We  
600 chose images that evoked strong average responses in a majority of the neurons reported  
601 in Coen-Cagli, Kohn, et al. (2015). In separate sessions, we measured size tuning with static  
602 circular gratings, with diameters of 0.34, 0.55, 0.90, 2.4 and 3.8 deg; orientations of 0, 45, 90  
603 and 135 deg; duration of 250 ms, and inter-stimulus duration of 100 ms. We set the spatial  
604 frequency (1 cycle/deg) to be appropriate for V1 neurons at the recorded eccentricity. Each  
605 stimulus was repeated 114-124 times. In the anesthetized experiments, we measured size  
606 tuning with static circular gratings, testing a larger range of conditions (diameters of 0.34,  
607 0.55, 0.90, 1.5, 2.4, 3.8 and 6.2 deg; orientations of 0,45,90 and 135 deg), and repeated each  
608 stimulus 20 times.

609 **Surround orientation tuning experiments.** We measured orientation tuning of surround  
610 modulation in two awake monkeys, using static compound gratings with a spatial frequency  
611 of 1 cyc/deg presented for 200 ms (100 ms inter-stimulus interval). For monkey M we used  
612 a central grating of diameter 1 deg, orientations of 0 and 90 deg, and an annular surround  
613 with inner diameter of 1 deg and outer diameter of 6 deg, with orientation either matched  
614 or orthogonal to the center. For monkey C, the central grating was 0.5 deg in diameter;  
615 orientations were 0, 45, 90 and 135 deg; and a surround with inner diameter of 1.5 deg and  
616 outer diameter of 5 deg, with orientation either matched or orthogonal to the center. We  
617 introduced this gap between center and surround stimulus, to reduce the extent to which  
618 the surround stimulus encroached on the neurons' RFs. The results for both monkeys were  
619 qualitatively similar. Therefore, we combined them in our analyses.

### 620 4.3 Data Analysis

621 For each electrode, we extracted waveform signals (sampled at 30 kHz) whenever the extra-  
622 cellular voltage exceeded a threshold of 5 times the square root of the mean square signal  
623 on each channel. We then sorted waveforms manually using the Plexon Offline Sorter, and  
624 isolated both single and multi-unit clusters, here both referred to as neurons. Data analysis  
625 was then performed in Julia (<https://julialang.org>).

626 **Characterization of neuronal responses and inclusion criteria.** We computed spike counts  
627 in a fixed window with length equal to the stimulus duration, shifted by 50 ms after stimulus  
628 onset. We also computed baseline activity in the 50 ms window from 20 ms before to 30 ms  
629 after stimulus onset. We excluded from further analyses all neurons that were not driven  
630 by any stimulus above baseline + 1 std. We also excluded all natural images and grating  
631 orientations that, when presented at a size closest to 1 degree (out of those presented), did  
632 not drive the neurons above the baseline + 1std. Next, we defined the response latency of  
633 each neuron as the first time at which the peristimulus time histograms (regularized using a  
634 smoothing cubic spline with parameter  $2 \cdot 10^{-6}$ ) at the preferred stimulus size (for size-tuning

635 experiments) or at the smallest size presented (0.5 or 1 degree, for the other experiments)  
636 crossed a threshold of baseline + 1 std. All further analyses were performed on spike counts  
637 in windows shifted by the latency of each individual neuron. In the surround modulation  
638 experiments on anesthetized monkeys with natural image patches (Fig. 2C) we selected only  
639 neurons that responded significantly to at least 10 distinct images.

640 We computed the mean spike-count by averaging across trials, and characterized variability  
641 by the Fano factor (FF), the ratio between across-trial variance and mean of the spike count.  
642 We focused on the FF because, when compared across conditions, it quantifies changes in  
643 variability beyond the changes in mean activity. We excluded neurons whose average FF  
644 across all stimulus conditions was larger than 2.

645 Because we were interested in surround modulation of variability, we excluded neurons with  
646 RFs not well centered on the stimuli. In experiments with anesthetized animals, we measured  
647 multi-unit spatial RFs using small circular oriented gratings (size 0.5 deg, 4 orientations, 250  
648 ms presentation), fitting the spike-counts with a two-dimensional Gaussian. We only kept for  
649 further analysis those neurons whose RF center was within 0.4 deg of the stimulus center.  
650 Due to the limited duration of the awake sessions, we could not measure spatial RFs prior to  
651 each session. We therefore relied only on the responsivity to small stimuli (described above),  
652 and on the following additional criteria (for size-tuning experiments, Fig. 2F and Table 1), as a  
653 proxy for appropriate stimulus centering. First, we excluded the neurons that had maximum  
654 response for very small (0.3 deg) or very large (> 4 deg) stimuli, because this was indicative of  
655 poor centering. Second, we excluded natural images that elicited weak surround suppression  
656 of the mean spike count (below 15%). We verified that our results did not change qualitatively  
657 when we changed this threshold (Supplementary Fig. S9).

658 Lastly, we excluded the neurons whose mean spike count was zero for any given stimulus  
659 size (for size tuning experiments) or surround condition (for surround orientation tuning  
660 experiments), because the FF is not defined in those cases. For the surround orientation  
661 tuning experiments (Fig. 3) we analyzed only the preferred orientation out of those presented,  
662 to ensure responses were robust enough that we could measure surround suppression effects  
663 reliably.

664 **Statistical analysis.** In the size tuning experiments (Fig. 2E-F and Table 1) we first computed  
665 mean spike-count and FF for each neuron, each stimulus size and condition (natural image  
666 identity or grating orientation). We then averaged across conditions, using mean for spike-  
667 counts and geometric mean for FFs, obtaining an area summation curve for both spike count  
668 and FF for each neuron (e.g. Fig. 2E). The differences in FF across sizes were measured as:

$$669 \quad \% \text{difference in FF} = 100 \cdot \frac{(\text{FF}_\alpha - \text{FF}_\beta)}{(\text{FF}_\alpha + \text{FF}_\beta) / 2} \quad (5)$$

670 Where  $\alpha$  refers to the stimulus size closer to RF and  $\beta$  to the stimulus size approximately

671 twice the RF. To visualize population averages in Fig. 2F and Supplementary Fig. S6-S7, we  
672 expressed stimulus size relative to RF size, and then averaged across neurons for each relative  
673 size. Note that some of the relative sizes were available only in a subpopulation with a specific  
674 RF size. In those points, averages refer to the available neurons. Supplementary Fig. S7  
675 shows instead the groups as separate. For the surround orientation tuning experiments,  
676 we quantified differences in FF also by Eq. 5, but with  $\alpha$  representing the stimulus with  
677 orthogonal surround, and  $\beta$  the stimulus with matching surround. Confidence intervals in  
678 the population plots were estimated by bootstrapping.

679 For the mean-matching tests in the area-summation experiment (Table 1 and Supplement,  
680 Fig. S3, we compared the FF between stimuli that were smaller versus larger than the RF, and  
681 elicited a similar trial-averaged spike count. Specifically, we pooled the mean spike counts of  
682 all neurons and stimuli smaller than the RF in one group, and all neurons and stimuli larger  
683 than the RF in a second group. We then subsampled the same number of cases from each  
684 group, so as to obtain identical histograms of mean spike counts. Lastly, we compared the FF  
685 distributions of the two groups. The  $p$ -values in Table 1 were computed using a paired sample  
686 t-test of the null hypothesis that differences between samples from the two conditions (i.e. RF  
687 size versus  $2\times$ RF size) had mean  $\leq 0$ .

## 688 **Acknowledgments**

689 We thank the Coen-Cagli and Kohn labs for helpful discussion, the Kohn lab for help with  
690 experiments, and Gergo Orbán for discussion and comments on a previous version of the  
691 manuscript. This work was supported by NIH grants EY030578 and EY021371.

## 692 **Author Contributions**

693 DF, AK and RCC designed the project; DF and RCC developed the theory and models; AA and  
694 AK performed the experiments; DF and AD analyzed the data; DF, AK and RCC wrote the  
695 paper.

## 696 **Data Availability**

697 Data for Fig. 2C and Supplementary Fig. S6B S6B are publicly available on the CRCNS data  
698 sharing site <https://crcns.org>. Data for the other figures will be made available by the  
699 authors upon request.

## 700 **Code Availability**

701 Code for model simulations and data analysis will be available without restrictions on GitHub  
702 (<https://github.com/rubencoencagli/festa-et-al-2020>).

## 703 **Materials & Correspondence**

704 Correspondence should be addressed to Ruben Coen-Cagli at [ruben.coen-cagli@einsteinmed.org](mailto:ruben.coen-cagli@einsteinmed.org).

## 705 **Competing Interests**

706 The authors have no competing interests.

## 707 **References**

- 708 Ahmadian, Y., D. B. Rubin, and K. D. Miller (2013). “Analysis of the stabilized supralinear  
709 network”. In: *Neural Comput* 25.8, pp. 1994–2037. DOI: [10.1162/NECO\\_a\\_00472](https://doi.org/10.1162/NECO_a_00472).
- 710 Albright, Thomas D. and Gene R. Stoner (2002). “Contextual Influences on Visual Processing”.  
711 In: *Annual Review of Neuroscience* 25.1, pp. 339–379. DOI: [10.1146/annurev.neuro.25.  
712 112701.142900](https://doi.org/10.1146/annurev.neuro.25.112701.142900).
- 713 Angelucci, Alessandra et al. (2002). “Circuits for Local and Global Signal Integration in Primary  
714 Visual Cortex”. In: *Journal of Neuroscience* 22.19, pp. 8633–8646. DOI: [10.1523/JNEUROSCI.  
715 22-19-08633.2002](https://doi.org/10.1523/JNEUROSCI.22-19-08633.2002).
- 716 Angelucci, Alessandra et al. (2017). “Circuits and Mechanisms for Surround Modulation in  
717 Visual Cortex”. In: *Annu Rev Neurosci* 40, pp. 425–451. DOI: [10.1146/annurev-neuro-  
718 072116-031418](https://doi.org/10.1146/annurev-neuro-072116-031418).
- 719 Arbelaez, P., M. Maire, C. Fowlkes, and J. Malik (2011). “Contour detection and hierarchical  
720 image segmentation”. In: *IEEE Trans Pattern Anal Mach Intell* 33.5, pp. 898–916. DOI: [10.  
721 1109/TPAMI.2010.161](https://doi.org/10.1109/TPAMI.2010.161).
- 722 Beck, Jeffrey M., Peter E. Latham, and Alexandre Pouget (2011). “Marginalization in neural  
723 circuits with divisive normalization”. In: *Journal of Neuroscience* 31.43, pp. 15310–15319.
- 724 Beck, Jeffrey M., Wei Ji Ma, Xaq Pitkow, Peter E. Latham, and Alexandre Pouget (2012). “Not  
725 noisy, just wrong: the role of suboptimal inference in behavioral variability”. In: *Neuron*  
726 74.1, pp. 30–9. DOI: [10.1016/j.neuron.2012.03.016](https://doi.org/10.1016/j.neuron.2012.03.016).
- 727 Bell, A. J. and T. J. Sejnowski (1997). “The ”independent components” of natural scenes are  
728 edge filters”. In: *Vision Res* 37.23, pp. 3327–38. DOI: [10.1016/s0042-6989\(97\)00121-1](https://doi.org/10.1016/s0042-6989(97)00121-1).

729 Berkes, Pietro, Gergö Orbán, Máté Lengyel, and József Fiser (2011). “Spontaneous Cortical  
730 Activity Reveals Hallmarks of an Optimal Internal Model of the Environment”. In: *Science*  
731 331.6013, pp. 83–87.

732 Bishop, Christopher M. (2006). *Pattern recognition and machine learning*. Information science  
733 and statistics. New York: Springer, p. 738.

734 Boerlin, Martin, Christian K. Machens, and Sophie Denève (2013). “Predictive Coding of  
735 Dynamical Variables in Balanced Spiking Networks”. In: *PLoS Comput Biol* 9.11, e1003258.  
736 DOI: [10.1371/journal.pcbi.1003258](https://doi.org/10.1371/journal.pcbi.1003258).

737 Britten, K. H., Michael N. Shadlen, William T. Newsome, and J. A. Movshon (1992). “The  
738 analysis of visual motion: a comparison of neuronal and psychophysical performance”. In:  
739 *J Neurosci* 12.12, pp. 4745–65.

740 Carandini, Matteo (2004). “Amplification of Trial-to-Trial Response Variability by Neurons in  
741 Visual Cortex”. In: *PLOS Biology* 2.9, e264. DOI: [10.1371/journal.pbio.0020264](https://doi.org/10.1371/journal.pbio.0020264).

742 Carandini, Matteo and David J. Heeger (2012). “Normalization as a canonical neural computa-  
743 tion”. In: *Nat Rev Neurosci* 13.1.

744 Cavanaugh, James R., Wyeth Bair, and J. Anthony Movshon (2002a). “Nature and Interaction  
745 of Signals From the Receptive Field Center and Surround in Macaque V1 Neurons”. In:  
746 *Journal of Neurophysiology* 88.5.

747 – (2002b). “Selectivity and Spatial Distribution of Signals From the Receptive Field Surround  
748 in Macaque V1 Neurons”. In: *Journal of Neurophysiology* 88.5, pp. 2547–2556. DOI: [10.1152/  
749 jn.00693.2001](https://doi.org/10.1152/jn.00693.2001).

750 Charles, Adam S., Mijung Park, J. Patrick Weller, Gregory D. Horwitz, and Jonathan W. Pillow  
751 (2018). “Dethroning the Fano Factor: A Flexible, Model-Based Approach to Partitioning  
752 Neural Variability”. In: *Neural Computation* 30.4, pp. 1012–1045. DOI: [10.1162/neco\\_a\\_  
753 01062](https://doi.org/10.1162/neco_a_01062).

754 Chen, Minggui et al. (2014). “Incremental Integration of Global Contours through Interplay  
755 between Visual Cortical Areas”. In: *Neuron* 82.3, pp. 682–694. DOI: [10.1016/j.neuron.  
756 2014.03.023](https://doi.org/10.1016/j.neuron.2014.03.023).

757 Churchland, Mark M. et al. (2010). “Stimulus onset quenches neural variability: a widespread  
758 cortical phenomenon”. In: *Nat Neurosci* 13.3, pp. 369–378. DOI: [10.1038/nn.2501](https://doi.org/10.1038/nn.2501).

759 Coen-Cagli, Ruben, Peter Dayan, and Odelia Schwartz (2012). “Cortical Surround Interactions  
760 and Perceptual Saliency via Natural Scene Statistics”. In: *PLOS Comput Biol* 8.3.

761 Coen-cagli, Ruben, Peter Dayan, and Odelia Schwartz (2009). “Statistical Models of Linear  
762 and Nonlinear Contextual Interactions in Early Visual Processing”. In: *Advances in Neural  
763 Information Processing Systems* 22.

764 Coen-Cagli, Ruben, Adam Kohn, and Odelia Schwartz (Nov. 2015). “Flexible gating of con-  
765 textual influences in natural vision”. en. In: *Nature Neuroscience* 18.11, pp. 1648–1655. DOI:  
766 [10.1038/nn.4128](https://doi.org/10.1038/nn.4128).

767 Coen-Cagli, Ruben and Selina S. Solomon (2019). “Relating Divisive Normalization to Neuronal  
768 Response Variability”. In: *J Neurosci* 39.37, pp. 7344–7356. DOI: [10.1523/JNEUROSCI.0126-  
769 19.2019](https://doi.org/10.1523/JNEUROSCI.0126-19.2019).



770 Cohen, Marlene R. and John H. R. Maunsell (2009). “Attention improves performance primarily  
771 by reducing interneuronal correlations”. In: *Nature Neuroscience* 12.12, pp. 1594–1600. DOI:  
772 [10.1038/nn.2439](https://doi.org/10.1038/nn.2439).

773 Dadarlat, Maria C. and Michael P. Stryker (2017). “Locomotion Enhances Neural Encoding of  
774 Visual Stimuli in Mouse V1”. In: *Journal of Neuroscience* 37.14, pp. 3764–3775. DOI: [10.1523/  
775 JNEUROSCI.2728-16.2017](https://doi.org/10.1523/JNEUROSCI.2728-16.2017).

776 Dayan, Peter and Larry Abbott (2005). *Theoretical Neuroscience: Computational and Mathematical  
777 Modeling of Neural Systems*. The MIT Press.

778 Dinstein, Ilan, David J. Heeger, and Marlene Behrmann (2015). “Neural variability: friend or  
779 foe?” In: *Trends in Cognitive Sciences* 19.6, pp. 322–328.

780 Doulgeris, Anthony P and Torbjørn Eltoft (2009). “Scale mixture of Gaussian modelling of po-  
781 larimetric SAR data”. In: *EURASIP Journal on Advances in Signal Processing* 2010.1, p. 874592.

782 Echeveste, Rodrigo, L. Aitchison, Guillaume Hennequin, and Máté Lengyel (2020). “Cortical-  
783 like dynamics in recurrent circuits optimized for sampling-based probabilistic inference”.  
784 In: *Nat Neurosci* 23.9, pp. 1138–1149. DOI: [10.1038/s41593-020-0671-1](https://doi.org/10.1038/s41593-020-0671-1).

785 Finn, I. M., N. J. Priebe, and D. Ferster (2007). “The emergence of contrast-invariant orientation  
786 tuning in simple cells of cat visual cortex”. In: *Neuron* 54.1, pp. 137–52. DOI: [10.1016/j.  
787 neuron.2007.02.029](https://doi.org/10.1016/j.neuron.2007.02.029).

788 Fiser, József, Pietro Berkes, Gergő Orbán, and Máté Lengyel (2010). “Statistically optimal  
789 perception and learning: from behavior to neural representations”. In: *Trends in Cognitive  
790 Sciences* 14.3, pp. 119–130.

791 Gao, Dashan and Nuno Vasconcelos (2007). *Bottom-up saliency is a discriminant process*, pp. 1–6.  
792 DOI: [10.1109/ICCV.2007.4408851](https://doi.org/10.1109/ICCV.2007.4408851).

793 Gardner, Justin L., Akiyuki Anzai, Izumi Ohzawa, and Ralph D. Freeman (1999). “Linear and  
794 nonlinear contributions to orientation tuning of simple cells in the cat’s striate cortex”. In:  
795 *Visual Neuroscience* 16.6, pp. 1115–1121. DOI: [10.1017/S0952523899166112](https://doi.org/10.1017/S0952523899166112).

796 Geisler, Wilson S. (2008). “Visual Perception and the Statistical Properties of Natural Scenes”.  
797 In: 59.1, pp. 167–192. DOI: [10.1146/annurev.psych.58.110405.085632](https://doi.org/10.1146/annurev.psych.58.110405.085632).

798 Goris, Robbe L. T., J. Anthony Movshon, and Eero P. Simoncelli (2014). “Partitioning neuronal  
799 variability”. In: *Nature neuroscience* 17.6, p. 858.

800 Haefner, Ralf M., Pietro Berkes, and József Fiser (2016). “Perceptual Decision-Making as  
801 Probabilistic Inference by Neural Sampling”. In: *Neuron* 90.3, pp. 649–660. DOI: [10.1016/j.  
802 neuron.2016.03.020](https://doi.org/10.1016/j.neuron.2016.03.020).

803 Haider, Bilal et al. (2010). “Synaptic and Network Mechanisms of Sparse and Reliable Visual  
804 Cortical Activity during Nonclassical Receptive Field Stimulation”. In: *Neuron* 65.1, pp. 107–  
805 121. DOI: [10.1016/j.neuron.2009.12.005](https://doi.org/10.1016/j.neuron.2009.12.005).

806 Heeger, David J. (1992). “Normalization of cell responses in cat striate cortex”. In: *Visual  
807 Neuroscience* 9.2, pp. 181–197. DOI: [10.1017/s0952523800009640](https://doi.org/10.1017/s0952523800009640).

808 Henaff, O. J., Z. M. Boudny-Singer, K. Meding, C. M. Ziemba, and Robbe L. T. Goris (2020).  
809 “Representation of visual uncertainty through neural gain variability”. In: *Nat Commun*  
810 11.1, p. 2513. DOI: [10.1038/s41467-020-15533-0](https://doi.org/10.1038/s41467-020-15533-0).

811 Hennequin, Guillaume, Yashar Ahmadian, Daniel B. Rubin, Máté Lengyel, and Kenneth D.  
812 Miller (2018). “The Dynamical Regime of Sensory Cortex: Stable Dynamics around a Single  
813 Stimulus-Tuned Attractor Account for Patterns of Noise Variability”. In: *Neuron* 98.4, 846–  
814 860.e5. DOI: [10.1016/j.neuron.2018.04.017](https://doi.org/10.1016/j.neuron.2018.04.017).

815 Hennequin, Guillaume, Laurence Aitchison, and Máté Lengyel (2014). “Fast Sampling-Based  
816 Inference in Balanced Neuronal Networks”. In: *Advances in Neural Information Processing  
817 Systems*. Ed. by Z. Ghahramani, M. Welling, C. Cortes, N. Lawrence, and K. Q. Weinberger.  
818 Vol. 27. Curran Associates, Inc.

819 Hoyer, P. O. and Aapo Hyvärinen (2003). “Interpreting neural response variability as Monte  
820 Carlo sampling of the posterior”. In: pp. 293–300.

821 Hunsberger, E., M. Scott, and C. Eliasmith (2014). “The competing benefits of noise and  
822 heterogeneity in neural coding”. In: *Neural Comput* 26.8, pp. 1600–23. DOI: [10.1162/NECO\\_a\\_00621](https://doi.org/10.1162/NECO_a_00621).

823

824 Hyvärinen, Aapo and P. O. Hoyer (2000). “Emergence of phase- and shift-invariant features by  
825 decomposition of natural images into independent feature subspaces”. In: *Neural Comput*  
826 12.7, pp. 1705–20. DOI: [10.1162/089976600300015312](https://doi.org/10.1162/089976600300015312).

827 Karklin, Y. and M. S. Lewicki (2009). “Emergence of complex cell properties by learning to  
828 generalize in natural scenes”. In: *Nature* 457.7225, pp. 83–6. DOI: [10.1038/nature07481](https://doi.org/10.1038/nature07481).

829 Knill, D. C. and Alexandre Pouget (2004). “The Bayesian brain: the role of uncertainty in  
830 neural coding and computation”. In: *Trends Neurosci* 27.12, pp. 712–9. DOI: [10.1016/j.tins.2004.10.007](https://doi.org/10.1016/j.tins.2004.10.007).

831

832 Kohn, Adam, Ruben Coen-Cagli, Ingmar Kanitscheider, and Alexandre Pouget (2016). “Cor-  
833 relations and Neuronal Population Information”. In: *Annual Review of Neuroscience* 39.1,  
834 pp. 237–256. DOI: [10.1146/annurev-neuro-070815-013851](https://doi.org/10.1146/annurev-neuro-070815-013851).

835 Kohn, Adam and Matthew A. Smith (2005). “Stimulus dependence of neuronal correlation in  
836 primary visual cortex of the macaque”. In: *Journal of Neuroscience* 25.14, pp. 3661–3673.

837 Legenstein, R. and W. Maass (2014). “Ensembles of spiking neurons with noise support optimal  
838 probabilistic inference in a dynamically changing environment”. In: *PLoS Comput Biol* 10.10,  
839 e1003859. DOI: [10.1371/journal.pcbi.1003859](https://doi.org/10.1371/journal.pcbi.1003859).

840 Lochmann, T., U. A. Ernst, and S. Deneve (2012). “Perceptual inference predicts contex-  
841 tual modulations of sensory responses”. In: *J Neurosci* 32.12, pp. 4179–95. DOI: [10.1523/JNEUROSCI.0817-11.2012](https://doi.org/10.1523/JNEUROSCI.0817-11.2012).

842

843 Ma, Wei Ji, Jeffrey M. Beck, Peter E. Latham, and Alexandre Pouget (2006). “Bayesian inference  
844 with probabilistic population codes”. In: *Nature Neuroscience* 9.11, pp. 1432–1438. DOI:  
845 [10.1038/nn1790](https://doi.org/10.1038/nn1790).

846 Mitchell, Jude F., Kristy A. Sundberg, and John H. Reynolds (2009). “Spatial Attention Decor-  
847 relates Intrinsic Activity Fluctuations in Macaque Area V4”. In: *Neuron* 63.6, pp. 879–888.  
848 DOI: [10.1016/j.neuron.2009.09.013](https://doi.org/10.1016/j.neuron.2009.09.013).

849 Moreno-Bote, Ruben et al. (2014). “Information-limiting correlations”. In: *Nat Neurosci* 17.10,  
850 pp. 1410–1417.

851 Nienborg, H. and B. G. Cumming (2014). “Decision-Related Activity in Sensory Neurons May  
852 Depend on the Columnar Architecture of Cerebral Cortex”. In: *Journal of Neuroscience* 34.10,  
853 pp. 3579–3585. DOI: [10.1523/jneurosci.2340-13.2014](https://doi.org/10.1523/jneurosci.2340-13.2014).

854 Olshausen, B. A. and D. J. Field (1996). “Emergence of simple-cell receptive field properties by  
855 learning a sparse code for natural images”. In: *Nature* 381.6583, pp. 607–9. DOI: [10.1038/  
856 381607a0](https://doi.org/10.1038/381607a0).

857 Orbán, Gergő, Pietro Berkes, József Fiser, and Mátè Lengyel (2016). “Neural Variability and  
858 Sampling-Based Probabilistic Representations in the Visual Cortex”. In: *Neuron* 92.2, pp. 530–  
859 543. DOI: <https://doi.org/10.1016/j.neuron.2016.09.038>.

860 Ponce-Alvarez, A., A. Thiele, T. D. Albright, G. R. Stoner, and G. Deco (2013). “Stimulus-  
861 dependent variability and noise correlations in cortical MT neurons”. In: *Proceedings of the  
862 National Academy of Sciences* 110.32, pp. 13162–13167. DOI: [10.1073/pnas.1300098110](https://doi.org/10.1073/pnas.1300098110).

863 Pouget, Alexandre, Jeffrey M. Beck, Wei Ji Ma, and Peter E. Latham (2013). “Probabilistic  
864 brains: knowns and unknowns”. In: *Nature Neuroscience* 16.9, pp. 1170–1178.

865 Pouget, Alexandre, Peter Dayan, and R. S. Zemel (2003). “Inference and computation with  
866 population codes”. In: *Annu Rev Neurosci* 26, pp. 381–410. DOI: [10.1146/annurev.neuro.  
867 26.041002.131112](https://doi.org/10.1146/annurev.neuro.26.041002.131112).

868 Rabinowitz, N. C., Robbe L. T. Goris, M. Cohen, and E. P. Simoncelli (2015). “Attention stabilizes  
869 the shared gain of V4 populations”. In: *Elife* 4, e08998. DOI: [10.7554/eLife.08998](https://doi.org/10.7554/eLife.08998).

870 Rao, R. P. and D. H. Ballard (1999). “Predictive coding in the visual cortex: a functional  
871 interpretation of some extra-classical receptive-field effects”. In: *Nat Neurosci* 2.1, pp. 79–87.  
872 DOI: [10.1038/4580](https://doi.org/10.1038/4580).

873 Rubin, Daniel B., Stephen D. Van Hooser, and Kenneth D. Miller (2015). “The Stabilized Supra-  
874 linear Network: A Unifying Circuit Motif Underlying Multi-Input Integration in Sensory  
875 Cortex”. In: *Neuron* 85.2, pp. 402–417. DOI: [10.1016/j.neuron.2014.12.026](https://doi.org/10.1016/j.neuron.2014.12.026).

876 Savin, Cristina and Sophie Denève (2014). “Spatio-temporal Representations of Uncertainty  
877 in Spiking Neural Networks”. In: *Advances in Neural Information Processing Systems*. Ed. by  
878 Z. Ghahramani, M. Welling, C. Cortes, N. Lawrence, and K. Q. Weinberger. Vol. 27. Curran  
879 Associates, Inc.

880 Sceniak, Michael P., Dario L. Ringach, Michael J. Hawken, and Robert Shapley (1999). “Con-  
881 trast’s effect on spatial summation by macaque V1 neurons”. In: *Nature Neuroscience* 2,  
882 p. 733.

883 Schwartz, O., T. J. Sejnowski, and Peter Dayan (2006). “Soft mixer assignment in a hierarchical  
884 generative model of natural scene statistics”. In: *Neural Comput* 18.11, pp. 2680–718. DOI:  
885 [10.1162/neco.2006.18.11.2680](https://doi.org/10.1162/neco.2006.18.11.2680).

886 Schwartz, O. and E. P. Simoncelli (2001). “Natural signal statistics and sensory gain control”.  
887 In: *Nat Neurosci* 4.8, pp. 819–825.

888 Shadlen, Michael N. and William T. Newsome (1998). “The Variable Discharge of Cortical  
889 Neurons: Implications for Connectivity, Computation, and Information Coding”. In: *The  
890 Journal of Neuroscience* 18.10, pp. 3870–3896. DOI: [10.1523/jneurosci.18-10-03870.1998](https://doi.org/10.1523/jneurosci.18-10-03870.1998).

891 Sillito, A. M. and H. E. Jones (1996). “Context-dependent interactions and visual processing in  
892 V1”. In: *Journal of Physiology-Paris* 90.3, pp. 205–209. DOI: [10.1016/S0928-4257\(97\)81424-](https://doi.org/10.1016/S0928-4257(97)81424-6)  
893 [6](https://doi.org/10.1016/S0928-4257(97)81424-6).

894 Simoncelli, E. P. and W. T. Freeman (1995). “The steerable pyramid: a flexible architecture  
895 for multi-scale derivative computation”. In: *Proceedings., International Conference on Image*  
896 *Processing*. Vol. 3, 444–447 vol.3. DOI: [10.1109/ICIP.1995.537667](https://doi.org/10.1109/ICIP.1995.537667).

897 Smith, Matthew A. and Adam Kohn (2008). “Spatial and temporal scales of neuronal correlation  
898 in primary visual cortex”. In: *J Neurosci* 28.48, pp. 12591–603. DOI: [10.1523/JNEUROSCI.](https://doi.org/10.1523/JNEUROSCI.2929-08.2008)  
899 [2929-08.2008](https://doi.org/10.1523/JNEUROSCI.2929-08.2008).

900 Snyder, A. C., M. J. Morais, A. Kohn, and Matthew A. Smith (2014). “Correlations in V1 Are  
901 Reduced by Stimulation Outside the Receptive Field”. In: *Journal of Neuroscience* 34.34,  
902 pp. 11222–11227.

903 Solomon, Selina S., Spencer C. Chen, John W. Morley, and Samuel G. Solomon (2014). “Local  
904 and Global Correlations between Neurons in the Middle Temporal Area of Primate Visual  
905 Cortex”. In: *Cerebral Cortex* 25.9, pp. 3182–3196. DOI: [10.1093/cercor/bhu111](https://doi.org/10.1093/cercor/bhu111).

906 Sompolinsky, Haim, Hyoungsoo Yoon, Kukjin Kang, and Maoz Shamir (2001). “Population  
907 coding in neuronal systems with correlated noise”. In: *Physical Review E* 64.5, p. 051904.

908 Spratling, M. W. (2010). “Predictive coding as a model of response properties in cortical area  
909 V1”. In: *J Neurosci* 30.9, pp. 3531–43. DOI: [10.1523/JNEUROSCI.4911-09.2010](https://doi.org/10.1523/JNEUROSCI.4911-09.2010).

910 Stevenson, Ian H. (2016). “Flexible models for spike count data with both over- and under-  
911 dispersion”. In: *Journal of Computational Neuroscience* 41.1, pp. 29–43. DOI: [10.1007/s10827-](https://doi.org/10.1007/s10827-016-0603-y)  
912 [016-0603-y](https://doi.org/10.1007/s10827-016-0603-y).

913 Theis, L., R. Hosseini, and M. Bethge (2012). “Mixtures of conditional Gaussian scale mixtures  
914 applied to multiscale image representations”. In: *PLoS One* 7.7, e39857. DOI: [10.1371/](https://doi.org/10.1371/journal.pone.0039857)  
915 [journal.pone.0039857](https://doi.org/10.1371/journal.pone.0039857).

916 Tolhurst, D. J., J. Anthony Movshon, and A. F. Dean (1983). “The statistical reliability of signals  
917 in single neurons in cat and monkey visual cortex”. In: *Vision research* 23 8, pp. 775–85.

918 Tomko, George J. and Donald R. Crapper (1974). “Neuronal variability: non-stationary re-  
919 sponses to identical visual stimuli”. In: *Brain Research* 79.3, pp. 405–418.

920 Verhoef, Bram-Ernst and John H. R. Maunsell (2017). “Attention-related changes in correlated  
921 neuronal activity arise from normalization mechanisms”. In: *Nature Neuroscience* 20.7.

922 Vinje, William E. and Jack L. Gallant (2000). “Sparse Coding and Decorrelation in Primary  
923 Visual Cortex During Natural Vision”. In: *Science* 287.5456, p. 1273. DOI: [10.1126/science.](https://doi.org/10.1126/science.287.5456.1273)  
924 [287.5456.1273](https://doi.org/10.1126/science.287.5456.1273).

925 Wainwright, M. J., E. P. Simoncelli, and A. S. Willsky (2000). “Random cascades of Gaussian  
926 scale mixtures and their use in modeling natural images with application to denoising”. In:  
927 vol. 1, 260–263 vol.1. DOI: [10.1109/ICIP.2000.900944](https://doi.org/10.1109/ICIP.2000.900944).

928 Walker, Gary A., Izumi Ohzawa, and Ralph D. Freeman (1999). “Asymmetric Suppression  
929 Outside the Classical Receptive Field of the Visual Cortex”. In: *The Journal of Neuroscience*  
930 19.23, pp. 10536–10553. DOI: [10.1523/jneurosci.19-23-10536.1999](https://doi.org/10.1523/jneurosci.19-23-10536.1999).

- 931 Webb, Ben S., Neel T. Dhruv, Samuel G. Solomon, Chris Tailby, and Peter Lennie (2005). “Early  
932 and Late Mechanisms of Surround Suppression in Striate Cortex of Macaque”. In: *Journal*  
933 *of Neuroscience* 25.50, pp. 11666–11675. DOI: [10.1523/JNEUROSCI.3414-05.2005](https://doi.org/10.1523/JNEUROSCI.3414-05.2005).
- 934 White, B., Larry Abbott, and J. Fiser (2012). “Suppression of cortical neural variability is  
935 stimulus- and state-dependent”. In: *J Neurophysiol* 108.9, pp. 2383–92. DOI: [10.1152/jn.](https://doi.org/10.1152/jn.00723.2011)  
936 [00723.2011](https://doi.org/10.1152/jn.00723.2011).
- 937 Zhu, M. and C. J. Rozell (2013). “Visual nonclassical receptive field effects emerge from sparse  
938 coding in a dynamical system”. In: *PLoS Comput Biol* 9.8, e1003191. DOI: [10.1371/journal.](https://doi.org/10.1371/journal.pcbi.1003191)  
939 [pcbi.1003191](https://doi.org/10.1371/journal.pcbi.1003191).
